# Supplementary material
Source: PubMed Central journal article supplement (PMC3238114)

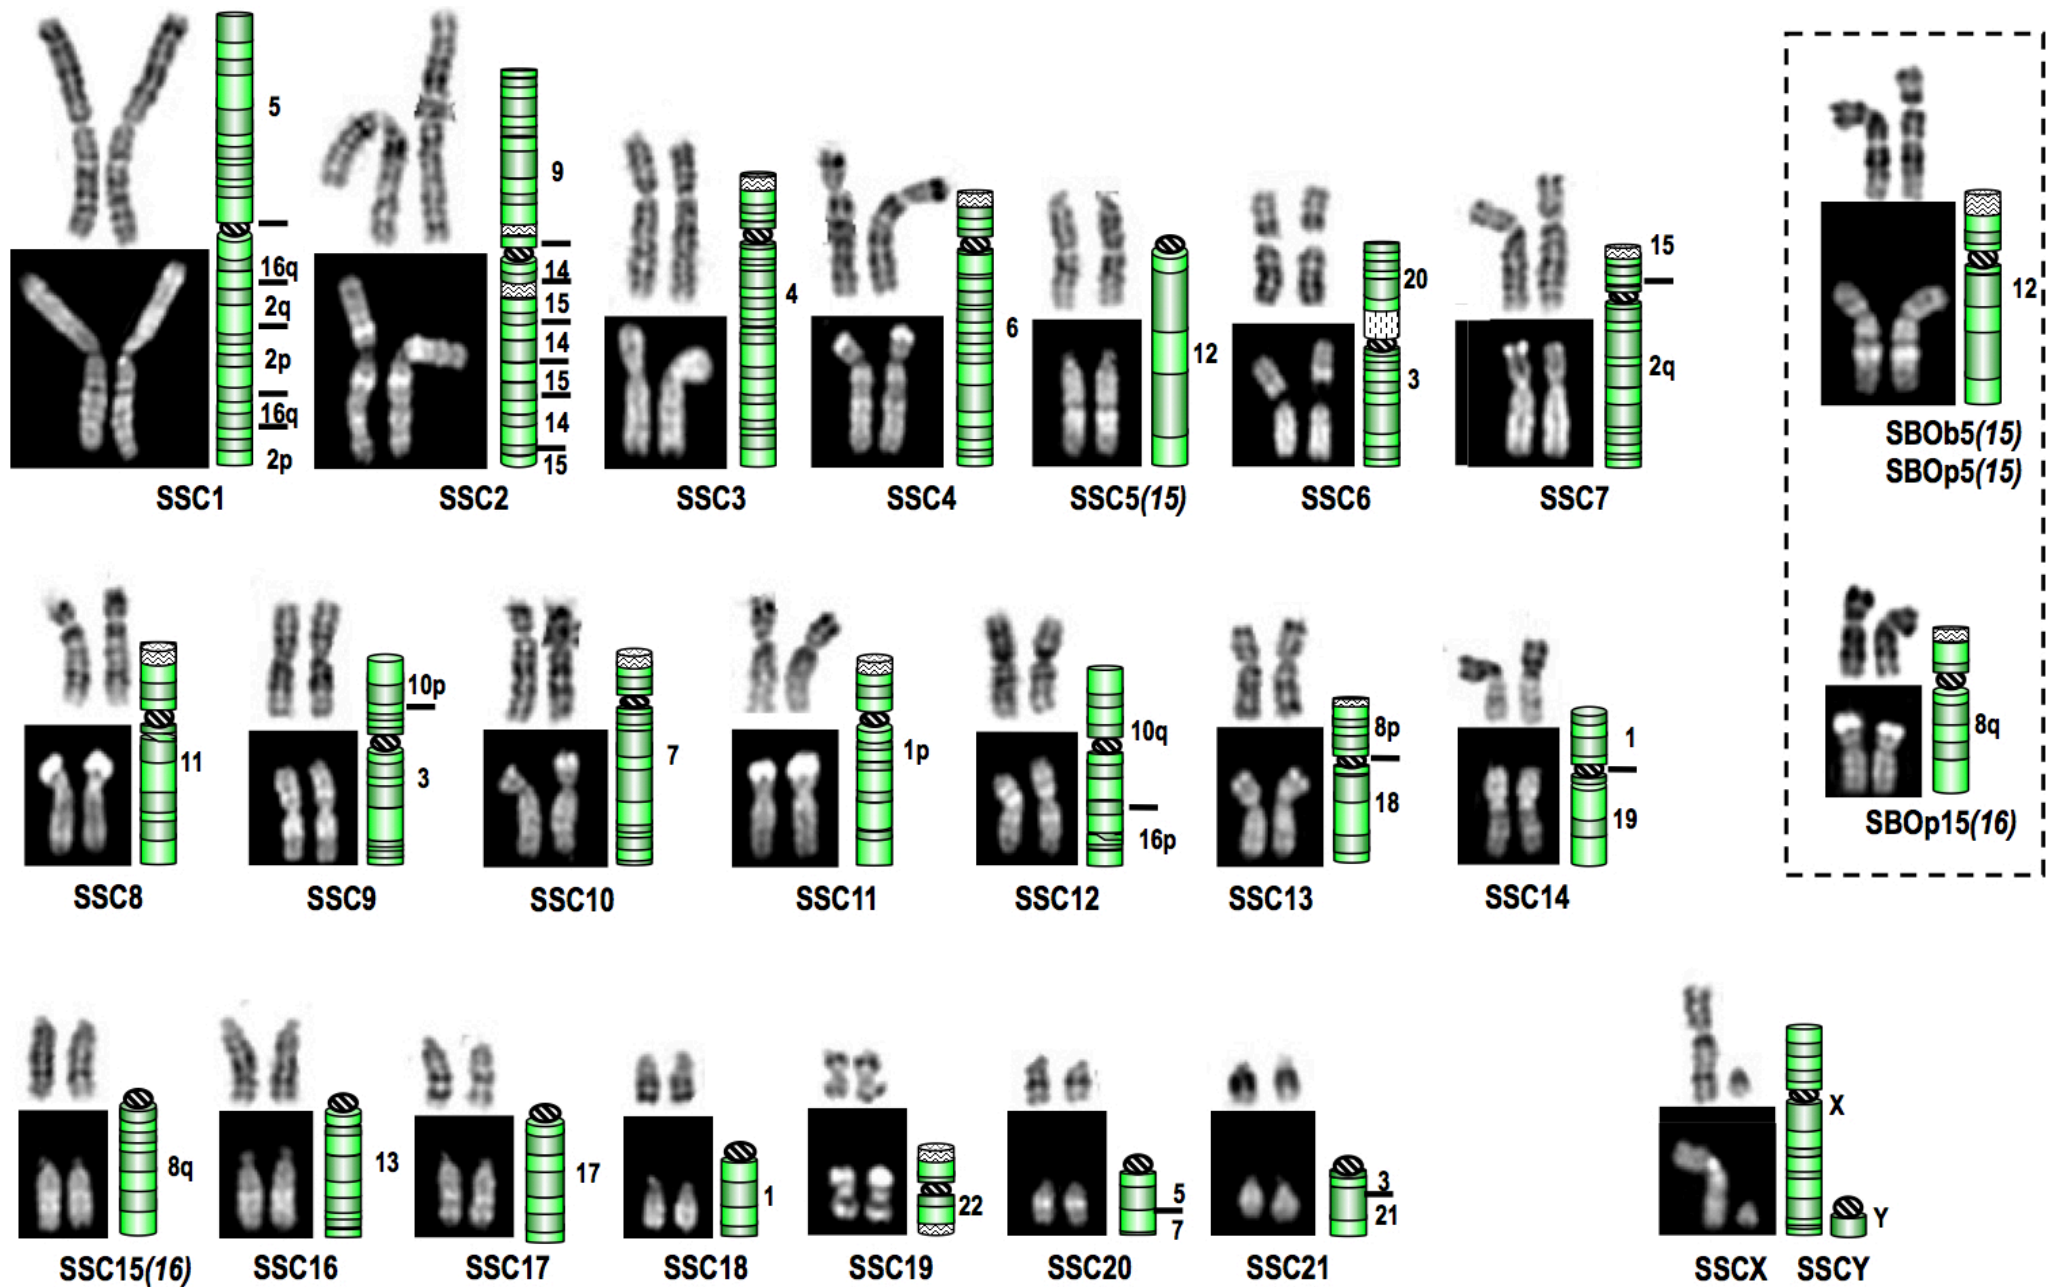

Supplement: hdy2011101x1.pdf [file hdy2011101x1.pdf]
